# Supplementary material
Source: Springer Nature journal article supplement (https://www.springermedizin.de/resource/supplementary/12936_2008_838_MOESM3_ESM.pdf/9549056)

# MDR N86Y - AQ

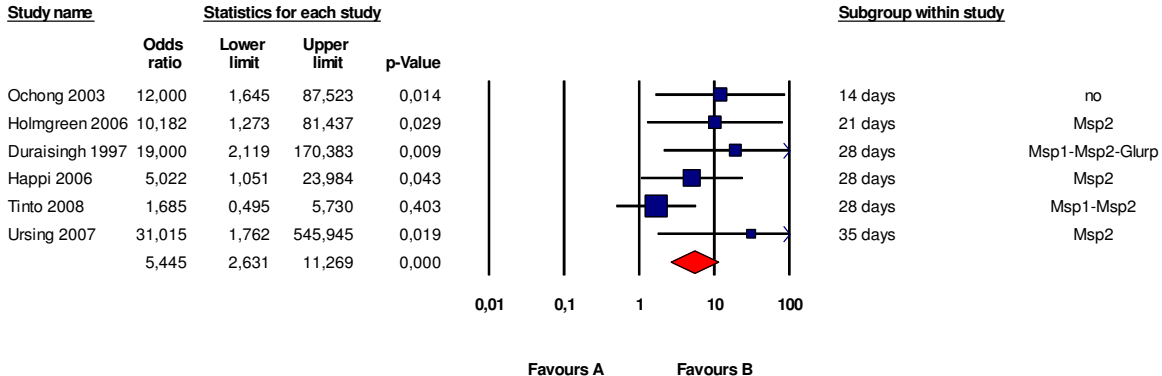

Supplement: MOESM3 [file 9549056]
